# Supplementary material for: Expression of lipid metabolism genes provides new insights into intramuscular fat deposition in Laiwu pigs
Source: PubMed Central journal article supplement (PMC7054625; doi:10.5713/ajas.18.0225), 2019-07-01

**Supplemental Table S1.** Primer sequences used for real-time PCR analysis

| <b>Gene</b>                    | <b>Forward (5'-3')</b> | <b>Reverse (5'-3')</b> | <b>Product size (bp)</b> |
|--------------------------------|------------------------|------------------------|--------------------------|
| Lipid metabolism related genes |                        |                        |                          |
| <i>ACACA</i>                   | TGGATGAGTTGGAAGTCGCT   | GGAGGACGCGTAATTTCCAC   | 168                      |
| <i>ACOX1</i>                   | TCACAGGAAGAGCAAGGAGG   | CGTGGGTGACTTGAGACTCT   | 242                      |
| <i>ACSL3</i>                   | GCAAGCGTGGAAAACAAACC   | AGACAGACAAGCTCAGCACT   | 233                      |
| <i>ACSS2</i>                   | CATCCTGTGAAGGGCGAATG   | CCGCCTCATGATTTTCCCTG   | 186                      |
| <i>ADIPOQ</i>                  | AGGCTGGATGGCGGGTAT     | TGCTGAACGGTAGACATAGGC  | 232                      |
| <i>ADIPOR1</i>                 | AGCATCTTCCGCATCCAC     | ACATCCCAAACACCACCTT    | 148                      |
| <i>AGPAT1</i>                  | TCTACAACGGCTGGATCCTC   | TTGGAGACGACGACATAGGG   | 190                      |
| <i>CEBPA</i>                   | TGGACAAGAACAGCAACGA    | ATCTGGAGACCCGAAACCA    | 317                      |
| <i>CEBPB</i>                   | TTCTACTACGAGGCGGACTG   | CAGGTATGGGCTGAAGTCGA   | 153                      |
| <i>CAT</i>                     | AGATGGACACAGGCACATGA   | CCGGATGCCATAGTCAGGAT   | 172                      |
| <i>CD36</i>                    | CGTGCCTATCCTCTGGCTTA   | AGTTGCAGGGACACTCATGA   | 232                      |
| <i>CPT1B</i>                   | CCCAATTCCAGATCCGCATG   | TGAGAACTTGCTGGAGACGT   | 155                      |
| <i>DGAT1</i>                   | CTCTTCCACTCCTGCCTGAA   | ACTCGTGGGAAGAAGGCTGAA  | 229                      |
| <i>DGAT2</i>                   | CAGTGGGTCCTGTCTTTCCT   | TCGAAAGTAGCGCCAAACAG   | 189                      |
| <i>FABP3</i>                   | GAGTTTGATGAGACAACAGCAG | TCTTCTCGTAAGTGCGAGTGC  | 188                      |
| <i>FABP4</i>                   | CTGAGATTGCCTTCAAATTG   | CTTGGCTTATGCTCTCTCATA  | 225                      |
| <i>FASN</i>                    | CTGATCAAGGTGCTGCTGTC   | CGAAGGAGTTTATGCCACG    | 160                      |
| <i>LEP</i>                     | CCCTCTGAATGGTCTGGGTT   | AGACCTCCAGAGCTTTCAC    | 155                      |
| <i>LEPR</i>                    | ATGACTTCCTCTGCCTGCT    | TTCCCTGCAATGTTGTCTGC   | 196                      |
| <i>LIPE</i>                    | TGCCTTAATGTGCCTCCTGA   | ATACCCGCAAAGACACCTGA   | 170                      |
| <i>LPL</i>                     | AAACATCCCTTTCACCCTG    | TGAGTCTCTCCTGCCTTCA    | 195                      |
| <i>MGLL</i>                    | CGTGGATGTCATGCAGAAGG   | AAGGTTGAGCACTTTCGCAG   | 199                      |
| <i>PNPLA2</i>                  | CGTGTACTGCAGCCTCATTC   | GAAGTGGATGCTGGTGTGG    | 196                      |
| <i>PPARA</i>                   | ATGAACAAGGACGGGATGC    | AAGAGGGAAAGGTCAGTGTGC  | 161                      |
| <i>PPARG</i>                   | CAGCATTTCCTCCACAC      | GACACAGGCTCCACTTTGA    | 123                      |
| <i>RXRG</i>                    | AGTTGTGAAGGCTGCAAAGG   | GCCTTCTTCTTGACAGCT     | 178                      |
| <i>SCD</i>                     | AGAAGACATCCGCCCTGAAA   | TCTTGCAGGTGGGGATCAAT   | 164                      |
| <i>SLC27A1</i>                 | AGGAGTAGAGGGCAAAGCAG   | CTGCTCAGGTCCAGGAAGA    | 241                      |
| <i>SLC2A4</i>                  | CCCCTGTGTGACTCTTGGAT   | CTCCCCGAAAAGTCAGTCTT   | 190                      |
| <i>SREBF1</i>                  | TACCGCTCCTCCATCAAT     | GGTCCTTCAGAGACTTGCTT   | 196                      |
| Reference genes                |                        |                        |                          |
| <i>B2M</i>                     | AAACGGAAAGCCAAATTACC   | ATCCACAGCGTTAGGAGTGA   | 178                      |
| <i>EEF1A1</i>                  | CAGATCAGTGCTGGTTACGC   | ATCGACAATGGCAGCATCAC   | 156                      |
| <i>GAPDH</i>                   | TCCAGTATGATTCCACCCAC   | GGAGGCATTGCTGACAATCT   | 314                      |
| <i>PPIA</i>                    | TCTGAGCACTGGGGAGAAAG   | TTTGCCATGGACAAGATGCC   | 192                      |
| <i>TBP</i>                     | GATGGACGTTTCGGTTTAGG   | AGCAGCACAGTACGAGCAA    | 193                      |

**Supplemental Figure S1.** mRNA abundance of lipid metabolism genes in backfat tissues in Laiwu and Duroc×Landrace×Yorkshire (DLY) pigs. \*  $p < 0.05$ .

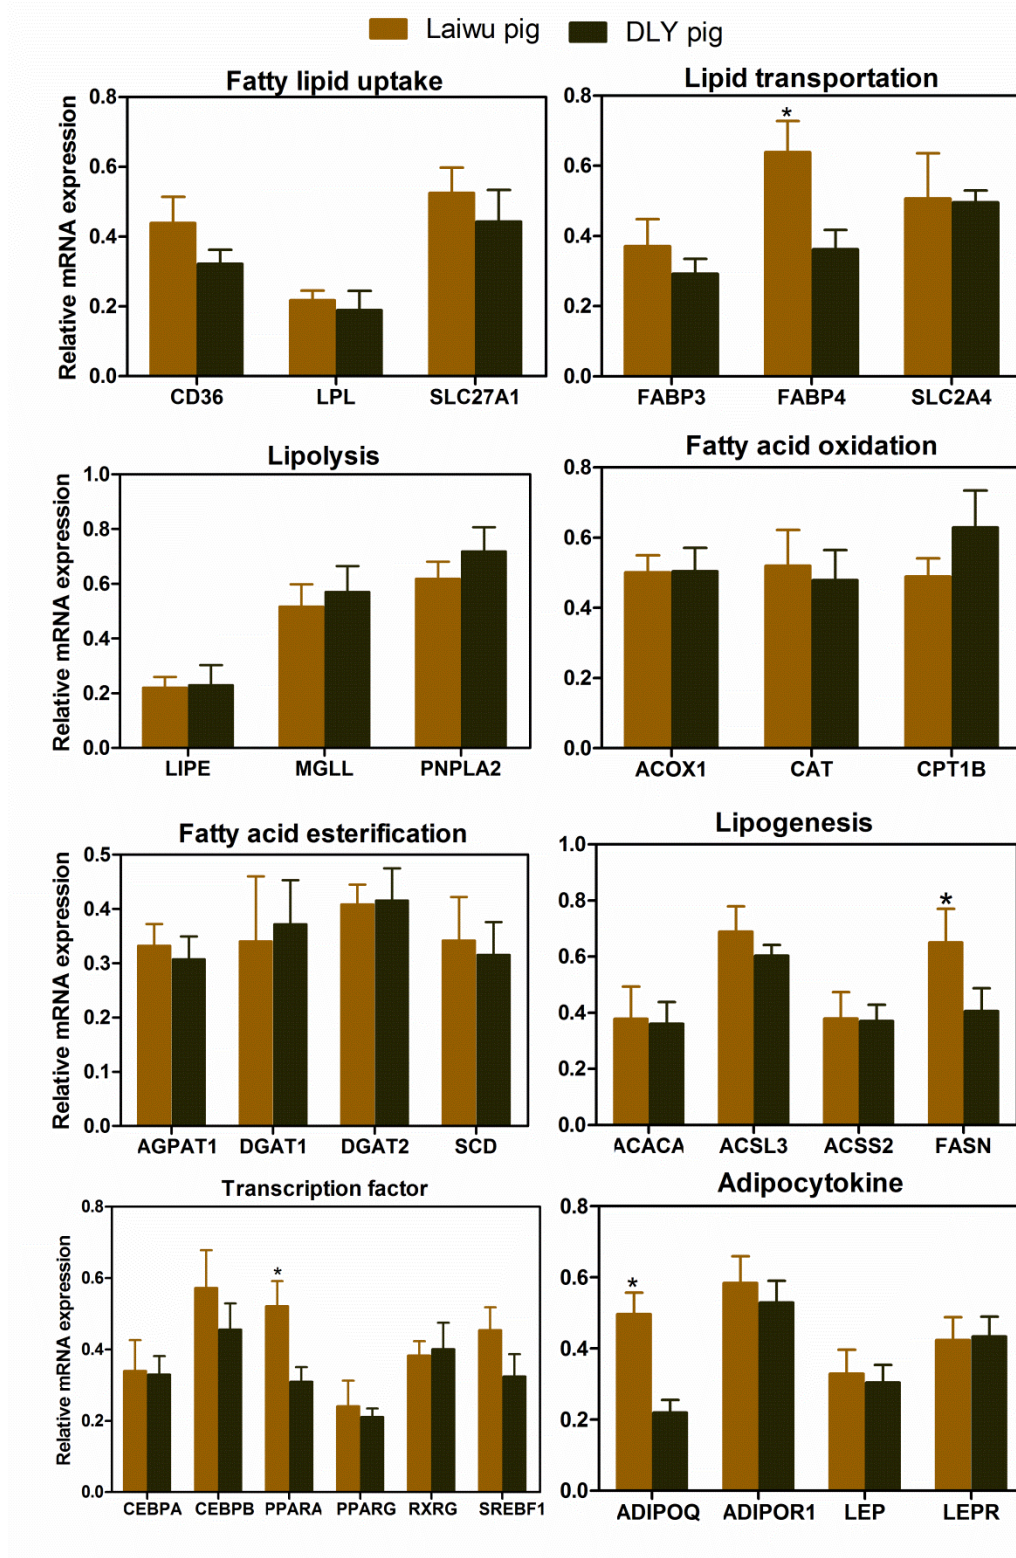

Supplement: ajas-18-0225-suppl.pdf [file ajas-18-0225-suppl.pdf]
